# Supplementary material
Source: publisher site journal article supplement (https://www.dovepress.com/article/216807)
Supplement: Supplementary file 1 [file get_supplementary_file.php]

((migraine[Text Word] OR headache[Text Word])) AND (((("Sleep Wake Disorders"[Mesh]) OR "Behavior Therapy"[Mesh])) OR sleep[Text Word])

History [Download history](#) [Clear history](#)

| Search | Add to builder      | Query                                                                                                                                                                                                                                                                                                                                                                                                                                                                                                                                                                   | Items found            | Time     |
|--------|---------------------|-------------------------------------------------------------------------------------------------------------------------------------------------------------------------------------------------------------------------------------------------------------------------------------------------------------------------------------------------------------------------------------------------------------------------------------------------------------------------------------------------------------------------------------------------------------------------|------------------------|----------|
| #31    | <a href="#">Add</a> | Search (((migraine[Text Word] OR headache[Text Word])) AND (((("Sleep Wake Disorders"[Mesh]) OR "Behavior Therapy"[Mesh])) OR sleep[Text Word]) Filters: Adolescent: 13-18 years; Preschool Child: 2-5 years; Child: 6-12 years                                                                                                                                                                                                                                                                                                                                         | <a href="#">1131</a>   | 05:26:37 |
| #37    | <a href="#">Add</a> | Search (((migraine[Text Word] OR headache[Text Word])) AND (((("Sleep Wake Disorders"[Mesh]) OR "Behavior Therapy"[Mesh])) OR sleep[Text Word]) Filters: Publication date from 1990/01/01 to 2017/12/31; English; Adolescent: 13-18 years; Preschool Child: 2-5 years; Child: 6-12 years                                                                                                                                                                                                                                                                                | <a href="#">794</a>    | 05:15:00 |
| #35    | <a href="#">Add</a> | Search (((migraine[Text Word] OR headache[Text Word])) AND (((("Sleep Wake Disorders"[Mesh]) OR "Behavior Therapy"[Mesh])) OR sleep[Text Word]) Filters: English; Adolescent: 13-18 years; Preschool Child: 2-5 years; Child: 6-12 years                                                                                                                                                                                                                                                                                                                                | <a href="#">968</a>    | 05:14:46 |
| #36    | <a href="#">Add</a> | Search (((migraine[Text Word] OR headache[Text Word])) AND (((("Sleep Wake Disorders"[Mesh]) OR "Behavior Therapy"[Mesh])) OR sleep[Text Word]) Filters: published in the last 10 years; English; Adolescent: 13-18 years; Preschool Child: 2-5 years; Child: 6-12 years                                                                                                                                                                                                                                                                                                | <a href="#">411</a>    | 05:14:06 |
| #34    | <a href="#">Add</a> | Search (((intervention[Text Word] OR treatment[Text Word] OR care[Text Word] OR management[Text Word] OR "patient education"[Text Word] OR "health promotion"[Text Word]) AND ( (adolescent[MeSH] OR child, preschool[MeSH] OR child[MeSH:noexp] ) )) AND (((migraine[Text Word] OR headache[Text Word])) AND (((("Sleep Wake Disorders"[Mesh]) OR "Behavior Therapy"[Mesh])) OR sleep[Text Word]) AND ( (adolescent[MeSH] OR child, preschool[MeSH] OR child[MeSH:noexp] ) )) Filters: English; Adolescent: 13-18 years; Preschool Child: 2-5 years; Child: 6-12 years | <a href="#">562</a>    | 05:13:21 |
| #33    | <a href="#">Add</a> | Search (((intervention[Text Word] OR treatment[Text Word] OR care[Text Word] OR management[Text Word] OR "patient education"[Text Word] OR "health promotion"[Text Word]) AND ( (adolescent[MeSH] OR child, preschool[MeSH] OR child[MeSH:noexp] ) )) AND (((migraine[Text Word] OR headache[Text Word])) AND (((("Sleep Wake Disorders"[Mesh]) OR "Behavior Therapy"[Mesh])) OR sleep[Text Word]) AND ( (adolescent[MeSH] OR child, preschool[MeSH] OR child[MeSH:noexp] ) )) Filters: Adolescent: 13-18 years; Preschool Child: 2-5 years; Child: 6-12 years          | <a href="#">631</a>    | 05:12:20 |
| #32    | <a href="#">Add</a> | Search (intervention[Text Word] OR treatment[Text Word] OR care[Text Word] OR management[Text Word] OR "patient education"[Text Word] OR "health promotion"[Text Word]) Filters: Adolescent: 13-18 years; Preschool Child: 2-5 years; Child: 6-12 years                                                                                                                                                                                                                                                                                                                 | <a href="#">836610</a> | 05:12:08 |
| #30    | <a href="#">Add</a> | Search (((migraine[Text Word] OR headache[Text Word])) AND (((("Sleep Wake Disorders"[Mesh]) OR "Behavior Therapy"[Mesh])) OR sleep[Text Word]) Filters: Adolescent: 13-18 years; Preschool Child: 2-5 years                                                                                                                                                                                                                                                                                                                                                            | <a href="#">991</a>    | 05:09:20 |
| #29    | <a href="#">Add</a> | Search (((migraine[Text Word] OR headache[Text Word])) AND (((("Sleep Wake Disorders"[Mesh]) OR "Behavior Therapy"[Mesh])) OR sleep[Text Word]) Filters: Adolescent: 13-18 years                                                                                                                                                                                                                                                                                                                                                                                        | <a href="#">920</a>    | 05:09:06 |
| #28    | <a href="#">Add</a> | Search (((migraine[Text Word] OR headache[Text Word])) AND (((("Sleep Wake Disorders"[Mesh]) OR "Behavior Therapy"[Mesh])) OR sleep[Text Word])                                                                                                                                                                                                                                                                                                                                                                                                                         | <a href="#">4124</a>   | 05:08:23 |
| #27    | <a href="#">Add</a> | Search (((("Sleep Wake Disorders"[Mesh]) OR "Behavior Therapy"[Mesh])) OR sleep[Text Word])                                                                                                                                                                                                                                                                                                                                                                                                                                                                             | <a href="#">216241</a> | 05:07:18 |
| #26    | <a href="#">Add</a> | Search sleep[Text Word]                                                                                                                                                                                                                                                                                                                                                                                                                                                                                                                                                 | <a href="#">153435</a> | 05:06:02 |
| #25    | <a href="#">Add</a> | Search ("Sleep Wake Disorders"[Mesh]) OR "Behavior Therapy"[Mesh]                                                                                                                                                                                                                                                                                                                                                                                                                                                                                                       | <a href="#">130977</a> | 05:04:33 |
| #23    | <a href="#">Add</a> | Search (((((((("Headache Disorders, Primary"[Majr]) OR ("Headache/rehabilitation"[Mesh] OR "Headache/therapy"[Mesh] )) OR ("Chronic Disease"[Mesh]) AND "Headache"[Mesh])) OR ("Pain Management"[Mesh]) AND "Headache"[Mesh])) OR ("Behavior Therapy"[Mesh]) AND "Headache"[Mesh])) OR (migraine[Text Word] OR headache[Text Word])                                                                                                                                                                                                                                     | <a href="#">88892</a>  | 05:01:24 |
| #22    | <a href="#">Add</a> | Search (migraine[Text Word] OR headache[Text Word])                                                                                                                                                                                                                                                                                                                                                                                                                                                                                                                     | <a href="#">88809</a>  | 05:00:14 |
| #21    | <a href="#">Add</a> | Search (((((((("Headache Disorders, Primary"[Majr]) OR ("Headache/rehabilitation"[Mesh] OR "Headache/therapy"[Mesh] )) OR ("Chronic Disease"[Mesh]) AND "Headache"[Mesh])) OR ("Pain Management"[Mesh]) AND "Headache"[Mesh])) OR ("Behavior Therapy"[Mesh]) AND "Headache"[Mesh])) OR (migraine[Text Word] OR headache[Text Word])                                                                                                                                                                                                                                     | <a href="#">28860</a>  | 04:57:42 |

((migraine[Text Word] OR headache[Text Word])) AND (((("Sleep Wake Disorders"[Mesh]) OR "Behavior Therapy"[Mesh])) OR sleep[Text Word])

Browser tabs: Hjem - KUB Nord - Index | REX | pubmed | Advanced search - PubMed | Susie Rimborg - Outlook

Address bar: <https://www.ncbi.nlm.nih.gov/pubmed/advanced>

|     |                     |                                                                                                                                                                                                                                                                                                                                                                                                                                                                                                                                                                               |                        |          |
|-----|---------------------|-------------------------------------------------------------------------------------------------------------------------------------------------------------------------------------------------------------------------------------------------------------------------------------------------------------------------------------------------------------------------------------------------------------------------------------------------------------------------------------------------------------------------------------------------------------------------------|------------------------|----------|
| #35 | <a href="#">Add</a> | Search (((migraine[Text Word] OR headache[Text Word])) AND (((("Sleep Wake Disorders"[Mesh]) OR "Behavior Therapy"[Mesh])) OR sleep[Text Word])) Filters: English; Adolescent: 13-18 years; Preschool Child: 2-5 years; Child: 6-12 years                                                                                                                                                                                                                                                                                                                                     | <a href="#">968</a>    | 05:14:46 |
| #36 | <a href="#">Add</a> | Search (((migraine[Text Word] OR headache[Text Word])) AND (((("Sleep Wake Disorders"[Mesh]) OR "Behavior Therapy"[Mesh])) OR sleep[Text Word])) Filters: published in the last 10 years; English; Adolescent: 13-18 years; Preschool Child: 2-5 years; Child: 6-12 years                                                                                                                                                                                                                                                                                                     | <a href="#">411</a>    | 05:14:06 |
| #34 | <a href="#">Add</a> | Search (((intervention[Text Word] OR treatment[Text Word] OR care[Text Word] OR management[Text Word] OR "patient education"[Text Word] OR "health promotion"[Text Word])) AND ( ( adolescent[MeSH] OR child, preschool[MeSH] OR child[MeSH:noexp] ) ) ) AND (((migraine[Text Word] OR headache[Text Word])) AND (((("Sleep Wake Disorders"[Mesh]) OR "Behavior Therapy"[Mesh])) OR sleep[Text Word])) AND ( ( adolescent[MeSH] OR child, preschool[MeSH] OR child[MeSH:noexp] ) ) ) Filters: English; Adolescent: 13-18 years; Preschool Child: 2-5 years; Child: 6-12 years | <a href="#">562</a>    | 05:13:21 |
| #33 | <a href="#">Add</a> | Search (((intervention[Text Word] OR treatment[Text Word] OR care[Text Word] OR management[Text Word] OR "patient education"[Text Word] OR "health promotion"[Text Word])) AND ( ( adolescent[MeSH] OR child, preschool[MeSH] OR child[MeSH:noexp] ) ) ) AND (((migraine[Text Word] OR headache[Text Word])) AND (((("Sleep Wake Disorders"[Mesh]) OR "Behavior Therapy"[Mesh])) OR sleep[Text Word])) AND ( ( adolescent[MeSH] OR child, preschool[MeSH] OR child[MeSH:noexp] ) ) ) Filters: Adolescent: 13-18 years; Preschool Child: 2-5 years; Child: 6-12 years          | <a href="#">631</a>    | 05:12:20 |
| #32 | <a href="#">Add</a> | Search (intervention[Text Word] OR treatment[Text Word] OR care[Text Word] OR management[Text Word] OR "patient education"[Text Word] OR "health promotion"[Text Word]) Filters: Adolescent: 13-18 years; Preschool Child: 2-5 years; Child: 6-12 years                                                                                                                                                                                                                                                                                                                       | <a href="#">836610</a> | 05:12:08 |
| #30 | <a href="#">Add</a> | Search (((migraine[Text Word] OR headache[Text Word])) AND (((("Sleep Wake Disorders"[Mesh]) OR "Behavior Therapy"[Mesh])) OR sleep[Text Word])) Filters: Adolescent: 13-18 years; Preschool Child: 2-5 years                                                                                                                                                                                                                                                                                                                                                                 | <a href="#">991</a>    | 05:09:20 |
| #29 | <a href="#">Add</a> | Search (((migraine[Text Word] OR headache[Text Word])) AND (((("Sleep Wake Disorders"[Mesh]) OR "Behavior Therapy"[Mesh])) OR sleep[Text Word])) Filters: Adolescent: 13-18 years                                                                                                                                                                                                                                                                                                                                                                                             | <a href="#">920</a>    | 05:09:06 |
| #28 | <a href="#">Add</a> | Search (((migraine[Text Word] OR headache[Text Word])) AND (((("Sleep Wake Disorders"[Mesh]) OR "Behavior Therapy"[Mesh])) OR sleep[Text Word]))                                                                                                                                                                                                                                                                                                                                                                                                                              | <a href="#">4124</a>   | 05:08:23 |
| #27 | <a href="#">Add</a> | Search (((("Sleep Wake Disorders"[Mesh]) OR "Behavior Therapy"[Mesh])) OR sleep[Text Word])                                                                                                                                                                                                                                                                                                                                                                                                                                                                                   | <a href="#">216241</a> | 05:07:18 |
| #26 | <a href="#">Add</a> | Search sleep[Text Word]                                                                                                                                                                                                                                                                                                                                                                                                                                                                                                                                                       | <a href="#">153435</a> | 05:06:02 |
| #25 | <a href="#">Add</a> | Search ("Sleep Wake Disorders"[Mesh]) OR "Behavior Therapy"[Mesh]                                                                                                                                                                                                                                                                                                                                                                                                                                                                                                             | <a href="#">130977</a> | 05:04:33 |
| #23 | <a href="#">Add</a> | Search (((("Headache Disorders, Primary"[Majr]) OR ("Headache/rehabilitation"[Mesh] OR "Headache/therapy"[Mesh]) ) OR ("Chronic Disease"[Mesh] AND "Headache"[Mesh]) ) OR ("Pain Management"[Mesh] AND "Headache"[Mesh]) ) OR ("Behavior Therapy"[Mesh] AND "Headache"[Mesh]) ) OR ((migraine[Text Word] OR headache[Text Word]))                                                                                                                                                                                                                                             | <a href="#">88892</a>  | 05:01:24 |
| #22 | <a href="#">Add</a> | Search (migraine[Text Word] OR headache[Text Word])                                                                                                                                                                                                                                                                                                                                                                                                                                                                                                                           | <a href="#">88809</a>  | 05:00:14 |
| #21 | <a href="#">Add</a> | Search (((("Headache Disorders, Primary"[Majr]) OR ("Headache/rehabilitation"[Mesh] OR "Headache/therapy"[Mesh]) ) OR ("Chronic Disease"[Mesh] AND "Headache"[Mesh]) ) OR ("Pain Management"[Mesh] AND "Headache"[Mesh]) ) OR ("Behavior Therapy"[Mesh] AND "Headache"[Mesh]) )                                                                                                                                                                                                                                                                                               | <a href="#">28860</a>  | 04:57:42 |
| #20 | <a href="#">Add</a> | Search ("Behavior Therapy"[Mesh] AND "Headache"[Mesh])                                                                                                                                                                                                                                                                                                                                                                                                                                                                                                                        | <a href="#">444</a>    | 04:55:24 |
| #18 | <a href="#">Add</a> | Search ("Pain Management"[Mesh] AND "Headache"[Mesh])                                                                                                                                                                                                                                                                                                                                                                                                                                                                                                                         | <a href="#">215</a>    | 04:54:19 |
| #16 | <a href="#">Add</a> | Search ("Chronic Disease"[Mesh] AND "Headache"[Mesh])                                                                                                                                                                                                                                                                                                                                                                                                                                                                                                                         | <a href="#">1295</a>   | 04:52:47 |
| #14 | <a href="#">Add</a> | Search ("Headache Disorders, Primary"[Majr]) OR ("Headache/rehabilitation"[Mesh] OR "Headache/therapy"[Mesh])                                                                                                                                                                                                                                                                                                                                                                                                                                                                 | <a href="#">28102</a>  | 04:51:43 |
| #1  | <a href="#">Add</a> | Search dosi AND ferri AND 105                                                                                                                                                                                                                                                                                                                                                                                                                                                                                                                                                 | <a href="#">1</a>      | 04:14:29 |
| #0  | <a href="#">Add</a> | pubmed clipboard                                                                                                                                                                                                                                                                                                                                                                                                                                                                                                                                                              | <a href="#">1</a>      | 04:36:08 |

Windows taskbar: 11:31 30-01-2017

## Appendix 2

| PICO          | Description                                                                                                                               |
|---------------|-------------------------------------------------------------------------------------------------------------------------------------------|
| Participants  | Children and adolescents diagnosed with headache aged 0 – 18 years. Headache diagnosed according to international headache society (IHS). |
| Interventions | This review focused on non-pharmacological randomized interventions                                                                       |
| Comparison    | All types of controls                                                                                                                     |
| Outcomes      | Pain; Sleep; Quality of Life; Coping                                                                                                      |
